# Supplementary material for: Graph-based description of tertiary lymphoid organs at single-cell level
Source: PubMed Central journal article supplement (PMC7055921; doi:10.1371/journal.pcbi.1007385), 2020-02-21
Supplement: pcbi.1007385.s001.pdf [file pcbi.1007385.s001.pdf]

## Graph-based description

### Visualization of compartments

Each graph  $G$  could be split in connected components  $S = (V_S, E_S)$  by deleting all edges  $e \in E \setminus E_\alpha$  labeled as  $\gamma$  (Figure 1), for which the concave hull was computed using the algorithm by [1]. Then, a cell compartment is defined by the area surrounded of the concave hull.

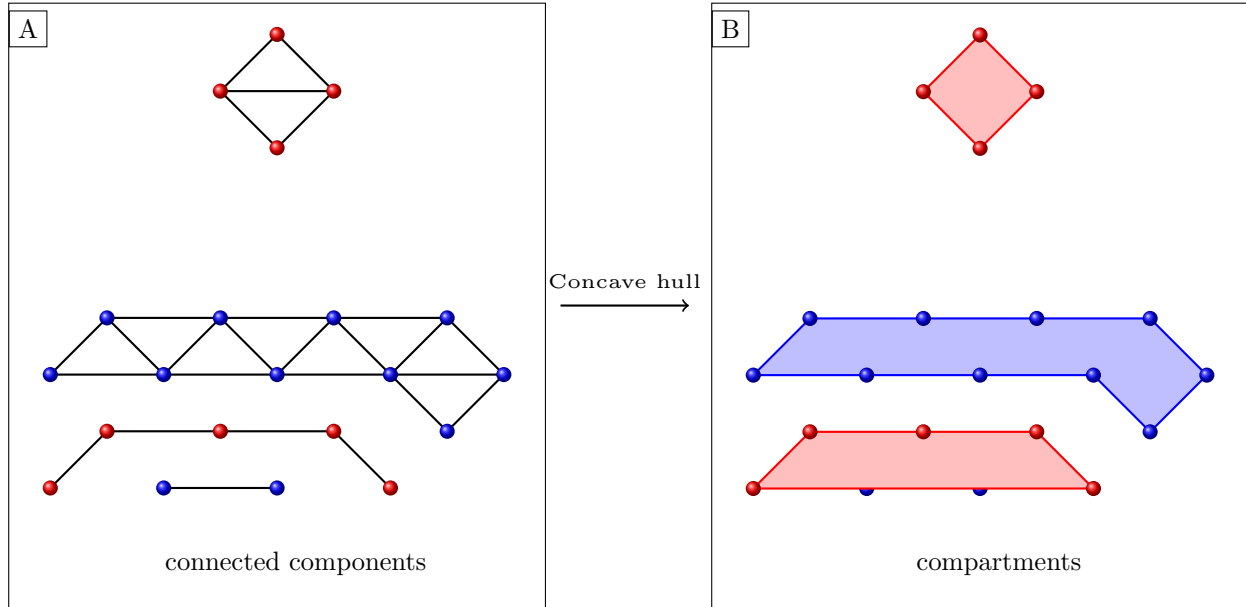

Figure 1: Visualization of compartments: All edges between cells of different phenotype were removed from the neighborhood graphs (see Fig. 42C of main document) and then **(A)** the graphs were split into connected components of a single phenotype. **(B)** Visualization by concave hull. Single cells/cell pairs do not span a compartment.

## References

- [1] Duckham M, Kulik L, Worboys M, Galton A. Efficient generation of simple polygons for characterizing the shape of a set of points in the plane. *Pattern Recognition*. 2008;41:3224–3236.
