# Supplementary material for: Graph-based description of tertiary lymphoid organs at single-cell level
Source: PubMed Central journal article supplement (PMC7055921; doi:10.1371/journal.pcbi.1007385), 2020-02-21
Supplement: pcbi.1007385.s005.pdf [file pcbi.1007385.s005.pdf]

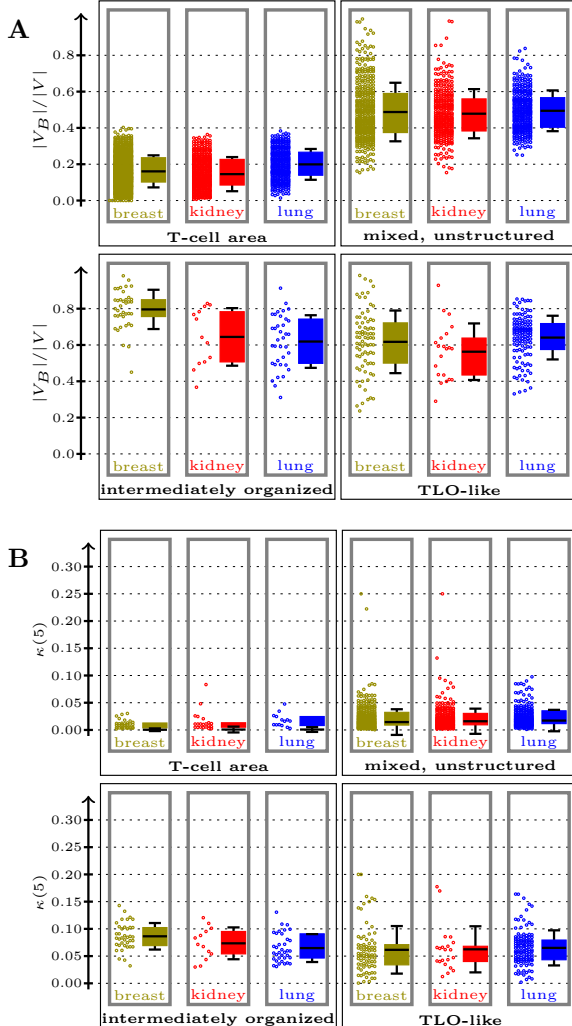

Figure 1: Distribution of relative number of B-cells (A) and organization (B): gray border represents significant difference between corresponding class and all remaining classes of same tissue type by Mann-Whitney  $U$  test using a significance level of 0.001.
