# Supplementary material for: Graph-based description of tertiary lymphoid organs at single-cell level
Source: PubMed Central journal article supplement (PMC7055921; doi:10.1371/journal.pcbi.1007385), 2020-02-21
Supplement: pcbi.1007385.s007.pdf [file pcbi.1007385.s007.pdf]

Table 1: Feasibility of support vector machine using 5-fold cross validation, measured in the test set of each fold and then averaged over all folds.

| breast                     |            |            |            |            |            |                      |
|----------------------------|------------|------------|------------|------------|------------|----------------------|
| Measure                    | <i>TPR</i> | <i>TNR</i> | <i>PPV</i> | <i>NPV</i> | <i>ACC</i> | <i>F<sub>1</sub></i> |
| T-cell area                | 0.928      | 0.761      | 0.750      | 0.944      | 0.831      | 0.824                |
| mixed, unstructured        | 0.493      | 0.822      | 0.689      | 0.726      | 0.692      | 0.539                |
| intermediately organized** | 0.000      | 0.989      | 0.000      | 0.929      | 0.920      | 0.000                |
| TLO-like                   | 0.667      | 0.912      | 0.463      | 0.956      | 0.881      | 0.526                |
| overall                    | 0.522      | 0.871      | 0.476      | 0.889      | 0.831      | 0.472                |
| kidney                     |            |            |            |            |            |                      |
| Measure                    | <i>TPR</i> | <i>TNR</i> | <i>PPV</i> | <i>NPV</i> | <i>ACC</i> | <i>F<sub>1</sub></i> |
| T-cell area                | 0.898      | 0.867      | 0.831      | 0.924      | 0.880      | 0.862                |
| mixed, unstructured        | 0.832      | 0.731      | 0.743      | 0.825      | 0.780      | 0.784                |
| intermediately organized*  | 0.000      | 0.992      | —          | 0.922      | 0.915      | 0.000                |
| TLO-like*                  | 0.000      | 1.000      | —          | 0.977      | 0.977      | 0.000                |
| overall                    | 0.432      | 0.898      | 0.787      | 0.912      | 0.888      | 0.412                |
| lung                       |            |            |            |            |            |                      |
| Measure                    | <i>TPR</i> | <i>TNR</i> | <i>PPV</i> | <i>NPV</i> | <i>ACC</i> | <i>F<sub>1</sub></i> |
| T-cell area                | 0.841      | 0.879      | 0.748      | 0.930      | 0.868      | 0.791                |
| mixed, unstructured        | 0.616      | 0.786      | 0.630      | 0.780      | 0.724      | 0.620                |
| intermediately organized   | 0.364      | 0.919      | 0.476      | 0.883      | 0.829      | 0.390                |
| TLO-like                   | 0.629      | 0.918      | 0.639      | 0.923      | 0.868      | 0.618                |
| overall                    | 0.612      | 0.876      | 0.623      | 0.879      | 0.822      | 0.605                |

\* no representatives of class in test set for each fold

\* maximum of two representatives of class in the test sets
